# Supplementary material for: Synthesis and thermal properties of an acetylenic monomer containing boron and silicon
Source: Royal Society of Chemistry journal article supplement (doi:10.1039/c6ra19410a), 2016-01-01
Supplement: c6ra19410a1.pdf [file c6ra19410a1.pdf]

## Electronic Supplementary Information

### Synthesis and Thermal Property of Acetylenic Monomer Containing Boron and Silicon

Shengli Cheng,<sup>a</sup> Lishuai Zong,<sup>a</sup> Kuanyu Yuan,<sup>a</sup> Jianhua Han,<sup>a</sup> Xigao Jian,<sup>b</sup> and Jinyan Wang<sup>\*b</sup>

<sup>a</sup> Polymer Science & Materials, Chemical Engineering College, Dalian University of Technology,  
Dalian, 116024, China Address here.

<sup>b</sup> State Key Laboratory of Fine Chemicals, Dalian University of Technology,  
Dalian, 116024, China. E-mal: [wangjinyan@dlut.edu.cn](mailto:wangjinyan@dlut.edu.cn).

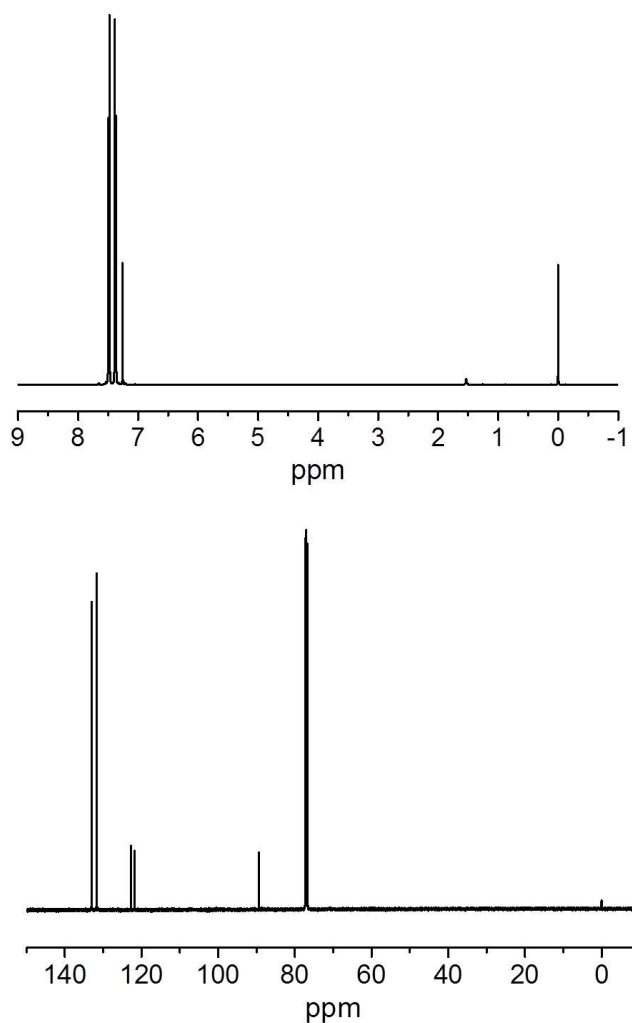

**Figure S1.** <sup>1</sup>H-NMR and <sup>13</sup>C-NMR spectra of 1,2-bis(4-bromophenyl)ethyne in CDCl<sub>3</sub>.

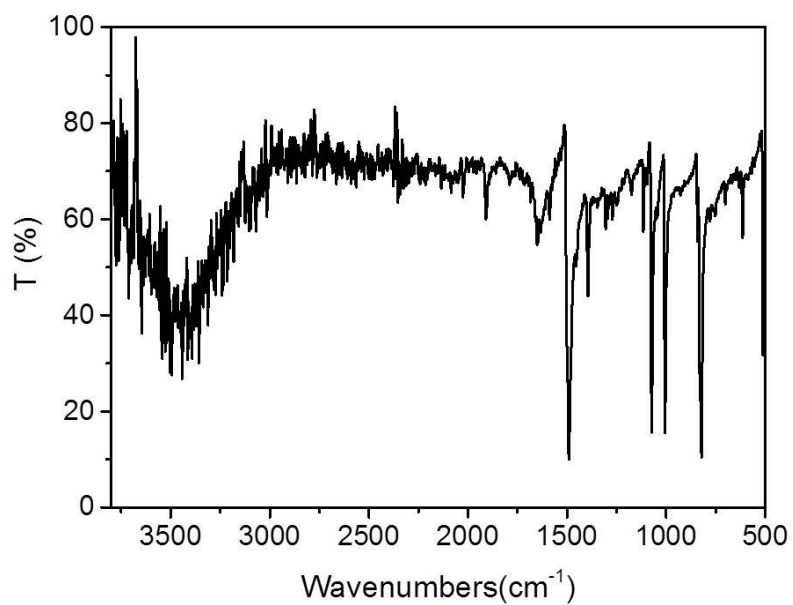

**Figure S2.** FT-IR spectrum of 1,2-bis(4-bromophenyl)ethyne.

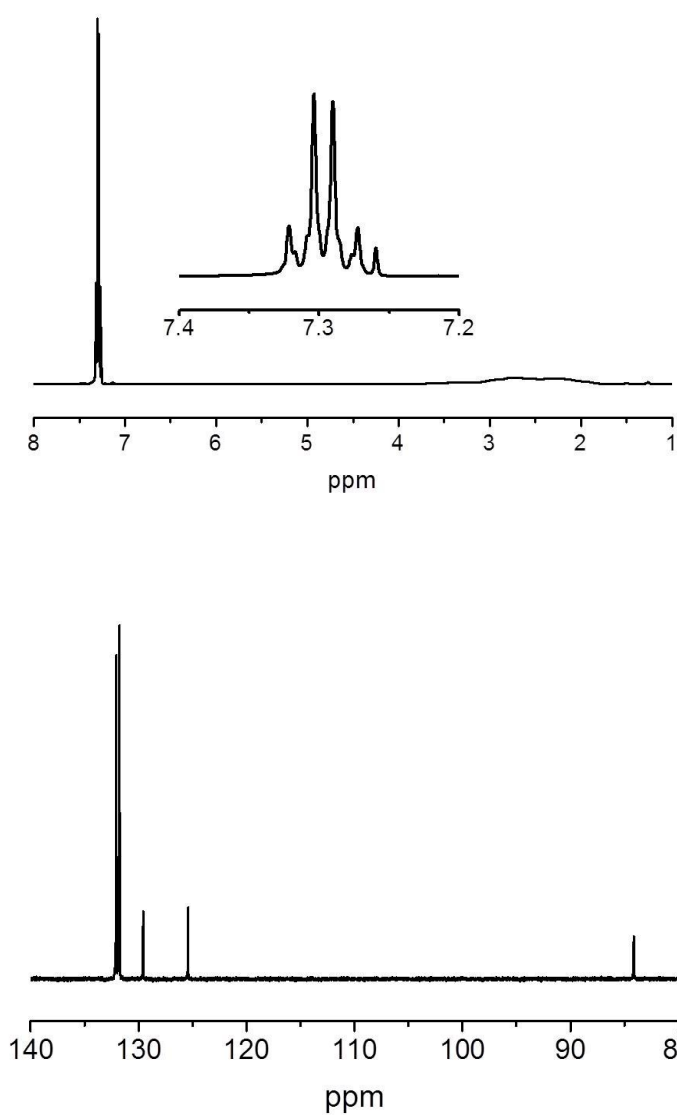

**Figure S3.**  $^1\text{H}$ -NMR and  $^{13}\text{C}$ -NMR spectra of 1,2-bis(4-bromophenyl)carborane in  $\text{CDCl}_3$ .

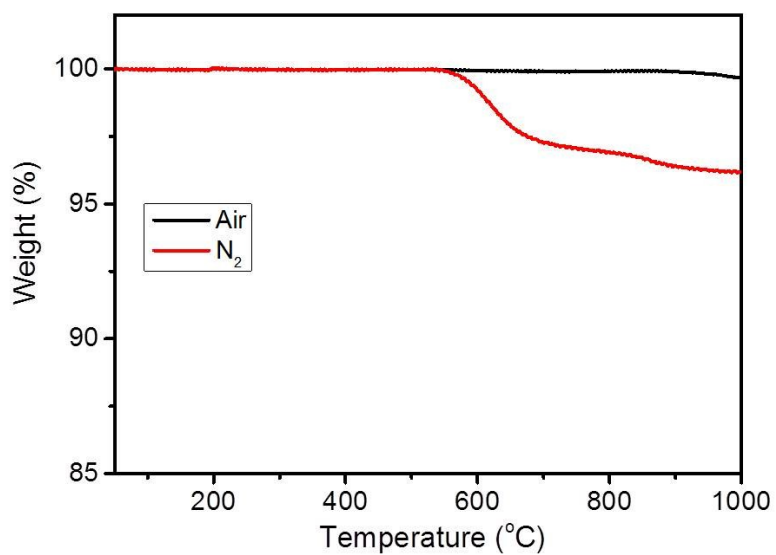

**Fig S4.** TGA curves of CBTMS-1000 in air and nitrogen atmosphere at heating rate of 20 °C min<sup>-1</sup>

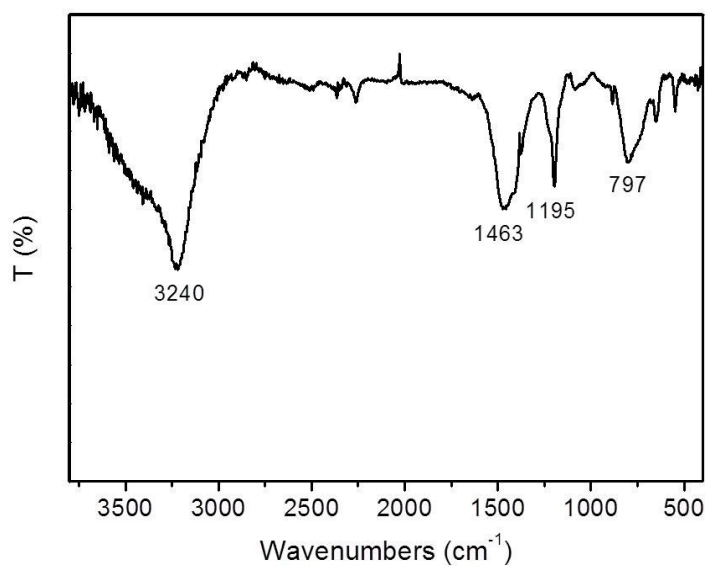

**Fig S5.** FT-IR spectrum of CBTMS-1000
